# Supplementary material
Source: HighWire-hosted journal article supplement (https://www.annfammed.org/highwire/filestream/8347/field_highwire_adjunct_files/0/Hudson_Supp_App.pdf)
Supplement: Hudson_Supp_App.pdf [file Hudson_Supp_App.pdf]

Online Supplementary Material

Hudson B, Zarifeh A, Young L, Wells J. Patients' expectations of screening and preventive treatments.. *Ann Fam Med*. 2012;10(6):495-502.

<http://www.annfammed.org/content/full/10/6/495>

Supplemental Appendix 1. Questionnaire: Intervention Questions

Example A

5,000 Men and women aged between 50 and 70 years diagnosed with osteoporosis (thinning of the bones which increases the risk of fracture) are given medication for 10 years to reduce the risk of fractures. Broken hips are an important type of fracture.

1. From this group, approximately how many hip fractures do you expect would be prevented by taking this medication?

*Tick one box only – If you don't know, please give your best estimate*

- 1
- 5
- 50
- 100
- 500
- 1000

2. This medication has no major side effects and costs the patient \$3 every 3 months. In your opinion, approximately how many hip fractures do you think should be prevented to justify the cost of prescriptions, risks, and inconveniences of the treatment?

*Tick one box only – If you don't know, please give your best estimate*

- 1
- 5
- 50
- 100
- 500
- 1000

3. Have you ever been diagnosed with osteoporosis?

4. Are you currently taking medication for osteoporosis?

*Eg, alendronate (Fosamax), zoledronic acid (Aclasta), calcium.*

Example B

5,000 Men and women aged between 50 and 70 years from the general population are screened for bowel cancer regularly for 10 years.

5. From this group, approximately how many deaths due to bowel cancer do you expect would be prevented by screening people for bowel cancer?

*Tick one box only – If you don't know, please give your best estimate*

- 1
- 5
- 50
- 100
- 500
- 1000

6. There is no financial cost for the patient for the bowel cancer screening tests. In your opinion, approximately how many lives do you think should be saved to justify the costs, risks, and inconveniences of screening for bowel cancer?

*Tick one box only – If you don't know, please give your best estimate*

- 1
- 5
- 50
- 100
- 500
- 1000

7. Have you ever had a bowel cancer screening test (eg, colonoscopy, faecal occult blood test, CT colonogram)?

**Example C**

5,000 Men and women aged between 50 and 70 years from the general population are given medication for 10 years to decrease their risk of dying of cardiovascular disease (disease of the heart and/or blood vessels).

8. From this group, approximately how many deaths due to cardiovascular disease do you expect would be prevented by taking this medication?

*Tick one box only – If you don't know, please give your best estimate*

- 1
- 5
- 50
- 100
- 500
- 1000

9. This medication has no major side effects and costs the patient \$3 every 3 months.

In your opinion, approximately how many lives do you think should be saved to justify the costs of prescriptions, risks, and inconveniences of the treatment?

*Tick one box only – If you don't know, please give your best estimate*

- 1
- 5
- 50
- 100
- 500
- 1000

10. Have you ever been diagnosed with, or experienced:

Angina, heart attack, stroke or blocked arteries in the heart or legs?

**Example D**

5,000 Women aged between 50 and 70 years from the general population are screened for breast cancer regularly for 10 years.

11. From this group, approximately how many deaths due to breast cancer do you expect would be prevented by participation in the screening programme?

*Tick one box only – If you don't know, please give your best estimate*

- 1
- 5
- 50
- 100
- 500
- 1000

12. There is no financial cost for the patient for the breast cancer screening tests.

In your opinion, approximately how many lives do you think should be saved to justify the costs, risks, and inconveniences of screening for breast cancer?

*Tick one box only – If you don't know, please give your best estimate*

- 1
- 5
- 50
- 100
- 500
- 1000
